# Supplementary material for: BixOyIz with oxygen vacancies for boosting the photocatalytic oxidation of bisphenol A and tetracycline
Source: Royal Society of Chemistry journal article supplement (doi:10.1039/d3nj00609c), 2023-01-01
Supplement: d3nj00609c1.pdf [file d3nj00609c1.pdf]

## Supplementary Material

### **Bi<sub>x</sub>O<sub>y</sub>I<sub>z</sub> with oxygen vacancy for boosting photocatalytic oxidation of bisphenol A and tetracycline**

Jing Xie,<sup>‡</sup> Suixin Yin,<sup>‡</sup> Zhengjiang Lu, Jindou Hu, Aize Hao, Yali Cao\*

*State Key Laboratory of Chemistry and Utilization of Carbon Based Energy Resources; College of  
Chemistry, Xinjiang University, Urumqi, 830046, Xinjiang, PR China.*

\*Corresponding author. Tel: +86-991-8583083; Fax: +86-991-8588883; Email:  
caoyali523@163.com (Yali. Cao).

<sup>‡</sup> Authors with equal contributions to this work.

## Supplementary Figures and Tables

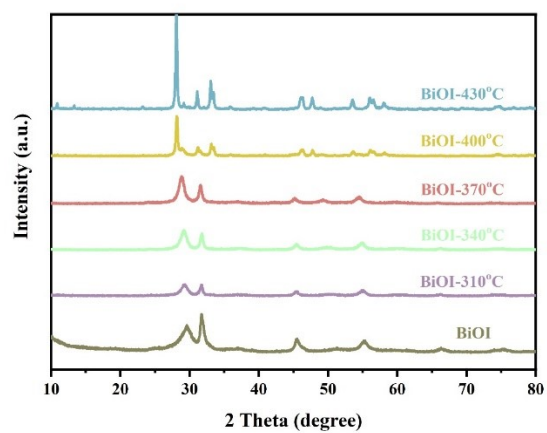

Fig. S1 The XRD patterns of BiOI, BiOI-310°C, BiOI-340°C, BiOI-370°C, BiOI-400°C and BiOI-430°C.

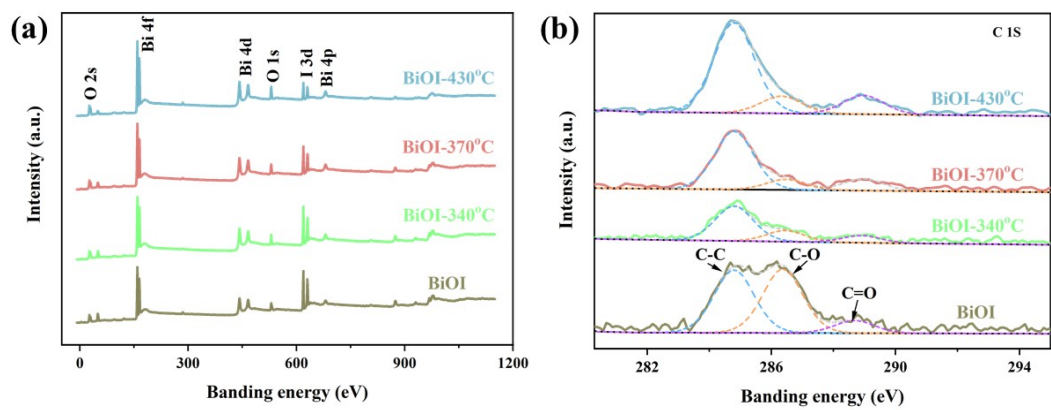

Fig. S2 The XPS spectra of pristine BiOI, BiOI-340°C, BiOI-370°C and BiOI-430°C:

(a) survey scan, (b) C 1s.

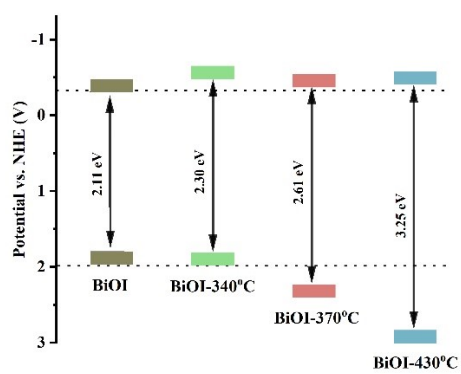

Fig. S3 The band position for BiOI, BiOI-340°C, BiOI-370°C and BiOI-430°C.

Table. S1 The relative content of Bi and I in BiOI, BiOI-340°C, BiOI-370°C and BiOI-430°C.

| Atom       | Bi 4f  | I 3d   | O 1s   | Bi/I |
|------------|--------|--------|--------|------|
| BiOI       | 17.9%  | 9.62%  | 36.59% | 1.86 |
| BiOI-340°C | 29.81% | 11.29% | 41.58% | 2.64 |
| BiOI-370°C | 26.32% | 7.98%  | 40.33% | 3.29 |
| BiOI-430°C | 23.98% | 3.43%  | 45.57% | 6.99 |
